# Supplementary material
Source: Springer Nature journal article supplement (https://www.springermedizin.de/resource/supplementary/12885_2010_2733_MOESM3_ESM.pdf/9461916)

**A****P = 0.012**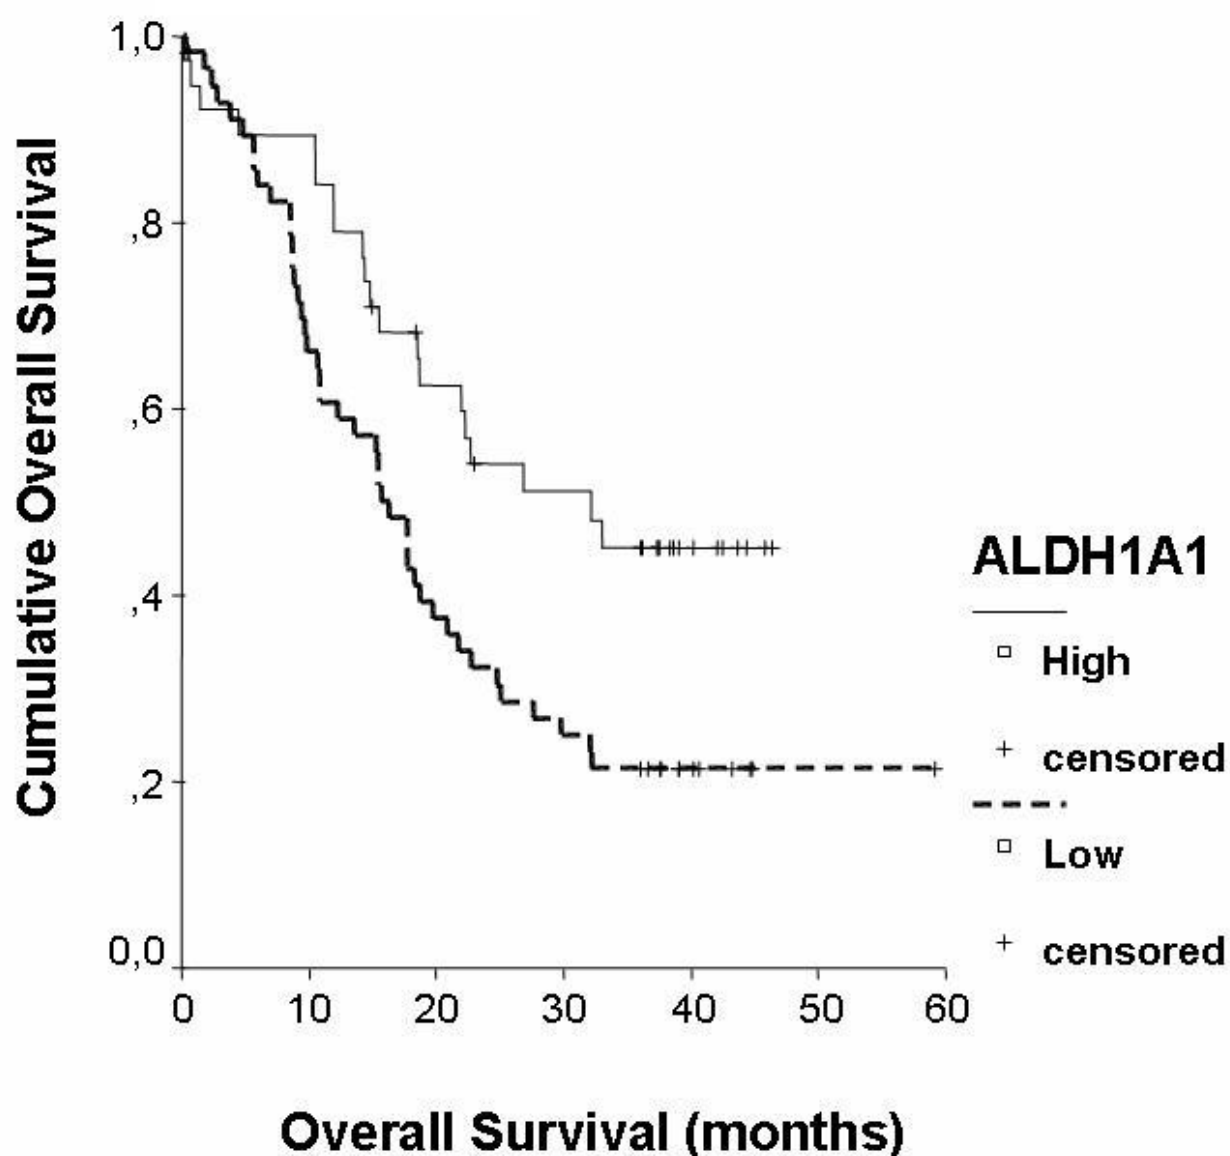**B****P = 0.029**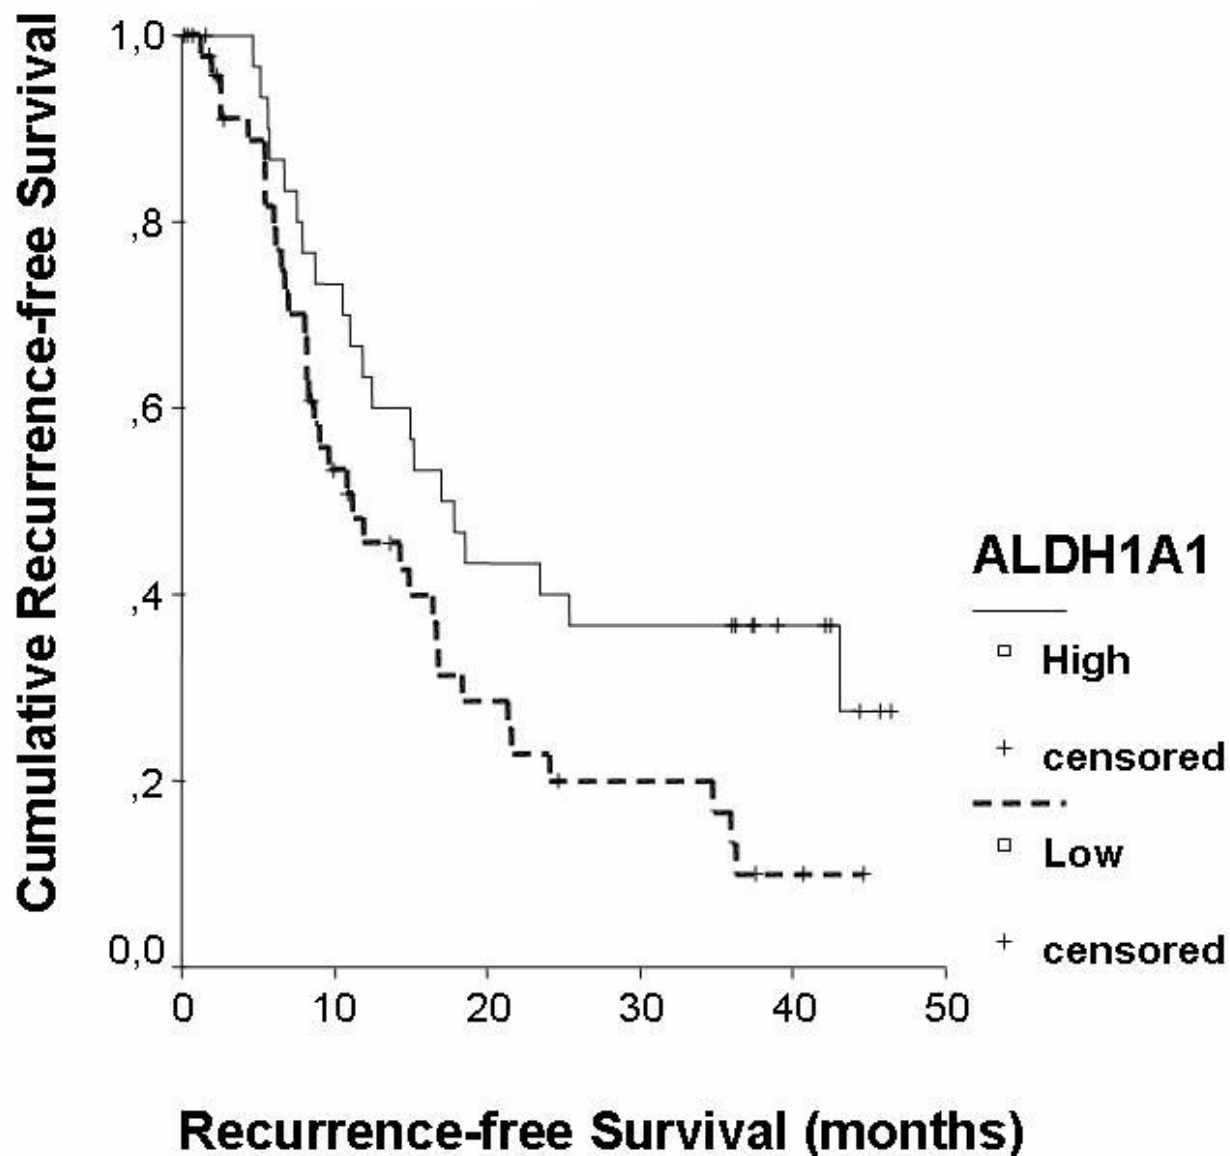

Supplement: MOESM3 [file 9461916]
